# Supplementary material
Source: PubMed Central journal article supplement (PMC6004484)
Supplement: pnas.1721814115.sapp.pdf [file pnas.1721814115.sapp.pdf]

## Supporting Information (SI) Appendix

### KDM4B protects against obesity and metabolic dysfunction

Yingduan Cheng<sup>a,1</sup>, Quan Yuan<sup>a,1</sup>, Laurent Vergnes<sup>b</sup>, Xin Rong<sup>c</sup>, Ji Youn Youn<sup>d</sup>, Jiong Li<sup>a</sup>, Yongxin Yu<sup>a</sup>, Wei Liu<sup>a</sup>, Hua Cai<sup>d</sup>, Jiandie Lin<sup>e</sup>, Peter Tontonoz<sup>c</sup>, Christine Hong<sup>f</sup>, Karen Reue<sup>b</sup>, Cun-Yu Wang<sup>a,g</sup> \*

<sup>a</sup>Laboratory of Molecular Signaling, Division of Oral Biology and Medicine, School of Dentistry, UCLA, Los Angeles, CA 90095, USA. <sup>b</sup>Department of Human Genetics, David Geffen School of Medicine, UCLA, Los Angeles, CA 90095, USA. <sup>c</sup>Department of Pathology and Laboratory Medicine, David Geffen School of Medicine, UCLA, Los Angeles, CA 90095, USA. <sup>d</sup>Department of Anesthesiology, David Geffen School of Medicine, UCLA, Los Angeles, CA 90095, USA. <sup>e</sup>Life Sciences Institute and Department of Cell & Developmental Biology, University of Michigan, Ann Arbor, MI 48109, USA. <sup>f</sup>Division of Growth and Development, School of Dentistry and UCLA, Los Angeles, CA 90095, USA. <sup>a,g</sup>Department of Bioengineering, Henry Samueli School of Engineering and Applied Science, Broad Stem Cell Research Center, and Jonsson Comprehensive Cancer Center, UCLA, Los Angeles, CA 90095, USA.

<sup>1</sup>Y. Cheng and Q. Yuan are the co-first authors

## Materials and Methods

### Histology.

Epi, SubQ, BAT, liver, and pancreatic tissues were fixed in 10% neutral-buffered formalin for 24 hours. Tissues were embedded in paraffin and sectioned at 4µm. H&E staining was performed according to the standard protocols. Pancreatic islets area was presented as an average score and 6 mice per group were counted. For Oil Red O staining, liver tissue was fixed in 1% formalin for 2 hours and embedded in OCT compound. The tissue was sectioned at 10µm and stained with Oil red O according to standard methods.

### Lipids and insulin measurement.

Serum triglyceride, total cholesterol, LDL cholesterol, and VLDL cholesterol lipid measurements were performed in Clinical Laboratory UCLA Division of Laboratory Animal Medicine. Free fatty acid levels were performed according to the manufacturer's protocol (Wako Diagnostics). Insulin levels were tested with an insulin kit from Biorbyt. All lipid from feces were extracted according to the protocol described before (1).

## **GTT and ITT.**

For GTT, mice received an IP injection of glucose (2g/kg body weight) after 16 hours of fasting. Blood was collected via the tail vein at 0, 15, 30, 60, 90 and 120 minutes. The blood glucose concentration was determined by glucometer. For ITT, mice were deprived of food for 4 hours and then an IP injection of insulin (0.75 units/body weight) were administered. Blood was collected from the tail vein at 0, 15, 30, 60 and 90 minutes and blood glucose concentrations were tested.

## **Indirect calorimetry and oxygen consumption rate.**

For indirect calorimetry, mice were individually housed for a week prior to the measurements. Indirect calorimetry was measured for 5 consecutive days. Energy expenditure was normalized by lean mass (2). The energy expenditure ANCOVA analysis done for this work was provided by the NIDDK Mouse Metabolic Phenotyping Centers (MMPC, [www.mmpc.org](http://www.mmpc.org)) using their Energy Expenditure Analysis page (<http://www.mmpc.org/shared/regression.aspx>) Oxygen consumption rates (OCR) in fresh tissues were measured with an XF24 Analyzer (Seahorse Bioscience) as described previously (3). Freshly isolated tissues were minced and rinsed in PBS, placed in a Seahorse Islet Plate (3-5 mg per well), and incubated with 625  $\mu$ l of unbuffered DMEM (containing 25 mM glucose, 1mM pyruvate, 2mM glutamine) 1 hr prior to measurements. Mixing, waiting and measurement times were 3, 2, and 3 min, respectively. OCR was measured at the baseline and after the injection of 0.75  $\mu$ M FCCP.

## **Lipolysis.**

Lipolysis analysis for cells was performed according to the manufacturer's protocol (Biovision). For the ex vivo assay, 50 mg samples of fat were put in 1.5 ml tubes containing 500  $\mu$ L of Krebs Ringer Buffer (KRB, 12mM HEPES, 121 mM; NaCl, 4.9 mM KCl, 1.2 mM MgSO<sub>4</sub>, 0.33 mM CaCl<sub>2</sub>, 2% fatty-acid free BSA and 0.1% glucose (5.5 mM). Samples were minced by scissors. One sample was for the basal condition and the second sample was for the stimulated condition by 10  $\mu$ M isoproterenol. An amount of 50  $\mu$ l samples were collected at time points of 0 hr, 1 hr, 2 hr and 4 hr. Glycerol levels were determined by Lipolysis Colorimetric Assay Kit (Biovision). All experiments were repeated at least three times.

## **Cold treatment.**

Mice were housed in a single cage and kept at 4°C for 6 hours. Temperature was measured in conscious mice at each hour using a BAT-12 digital thermometer (Physitemp) with a Ret-3 rectal probe designed for mice. After 6 hours, fat tissues were collected for RNA extraction and ChIP assay.

## **RNA extraction, qRT-PCR and gene expression study.**

Total RNA was extracted from the cells or tissues with Trizol reagent according to the manufacturer's protocol (Invitrogen). The cDNA was synthesized with Random hexamers by using SuperScript III (Invitrogen). qRT-PCR analysis was carried out with iQ SYBR Green Supermix (Bio-Rad) on an iCycler iQ real-time PCR detection system (Bio-Rad). 36B4 or Hprt was used as internal controls. All primer sequences were listed in Table S1. The procedure of microarray and data analysis was described before (4). In brief, One  $\mu$ g of RNA

from each sample was hybridized to Affymetrix Mouse 430 2.0 Arrays at the UCLA DNA Microarray Facility. Microarray cluster analysis was described before (5).

### **ChIP-qPCR and ChIP-Seq assays.**

The chromatin immunoprecipitation protocol was described previously (6, 7). For ChIP in adipose tissue, we obtained the nuclear extract first (7). Briefly, adipose tissue was minced into small pieces using two pairs of sterile surgical scissors and fixed with 1% formaldehyde for 15 min. Cross-linking was stopped by adding glycine to a final concentration of 125mM for additional incubation with moderate shaking. Samples were then centrifuged at 2,500 rpm for 5 min, and placed on ice until the end of the procedure. Three distinct phases could be readily visualized at this point: 1) tissue aggregates of higher density (pellet, tissue debris), 2) buffer containing the PBS, formaldehyde and glycine (intermediate liquid phase), and 3) lipid-rich (low-density) tissue pieces and fat (upper layer). The upper phase was kept and washed twice with ice-cold 1× PBS supplemented with PI followed by centrifugation (2,500 rpm, 5 min, 4°C). Small adipose pieces were re-suspended in 3 ml of adipocyte lysis buffer (0.02M Tris, PH 8.0, 80 mM KCl, and 0.5% NP-40) supplemented with PI and homogenized using a Dounce homogenizer (20 strokes). Then the samples were kept on ice for 15 min to ensure rupture of the cell membranes and the release of the nuclei. Twenty additional strokes were carried out followed by a larger particle removal using 250 µm mesh. The samples were centrifuged (5 min, 2,500 rpm, 4°C) and the pellet of the nuclei was re-suspended in 500 µl of SDS lysis buffer supplemented with PI (1% SDS, 10 mM EDTA, pH 8.1, and 50 mM Tris·HCl, pH 8.1), transferred to a sterile 1.5-ml Eppendorf tube and incubated on ice for 10 min prior to sonication. A standard protocol was followed after sonication. The antibodies we used were: KDM4B (Bethyl, A301-478A), H3K9me3 (abcam, ab8898), CREB (abcam, ab31387), H4ac (Active motif, 39243), and normal Rabbit IgG (Millipore, 12-370). For ChIP-seq of Flag-KDM4B, preadipocytes were isolated from Kdm4b KO mice, Kdm4b<sup>-/-</sup>-preadipocytes were infected with retroviruses expressing Flag-KDM4B or the empty vector and selected with puromycin for one week. Subsequently, cells were induced to differentiate into adipocytes that were utilized for ChIP-Seq. ChIP was performed, as described before, with Mouse Flag M2 antibody (Sigma, F3165) (8). Libraries were prepared using KAPA Hyper Prep Kit according to the manufacturer's protocol. The sequencing was performed at Clinical Microarray Core, UCLA with HiSeq 2000 system (Illumina). The analysis of ChIP-Seq data was described before (8). All sequencing reads were mapped to NCBI build 37 (mm9) of mouse genome using the software Bowtie. Here, a P value <math>1.0 \times 10^{-4}</math> was chosen to give a false discovery rate of <math><5\%</math>. Only reads that aligned to a unique genomic position with no more than two mismatches were retained for the above analysis. Only one read was counted if multiple reads mapped to the same position in the genome at the same time. Representative ChIP-seq enriched regions were visualized in the Integrated Genome Browser. Genes with significant peaks within 5 kb of their TSSs were considered as bound.

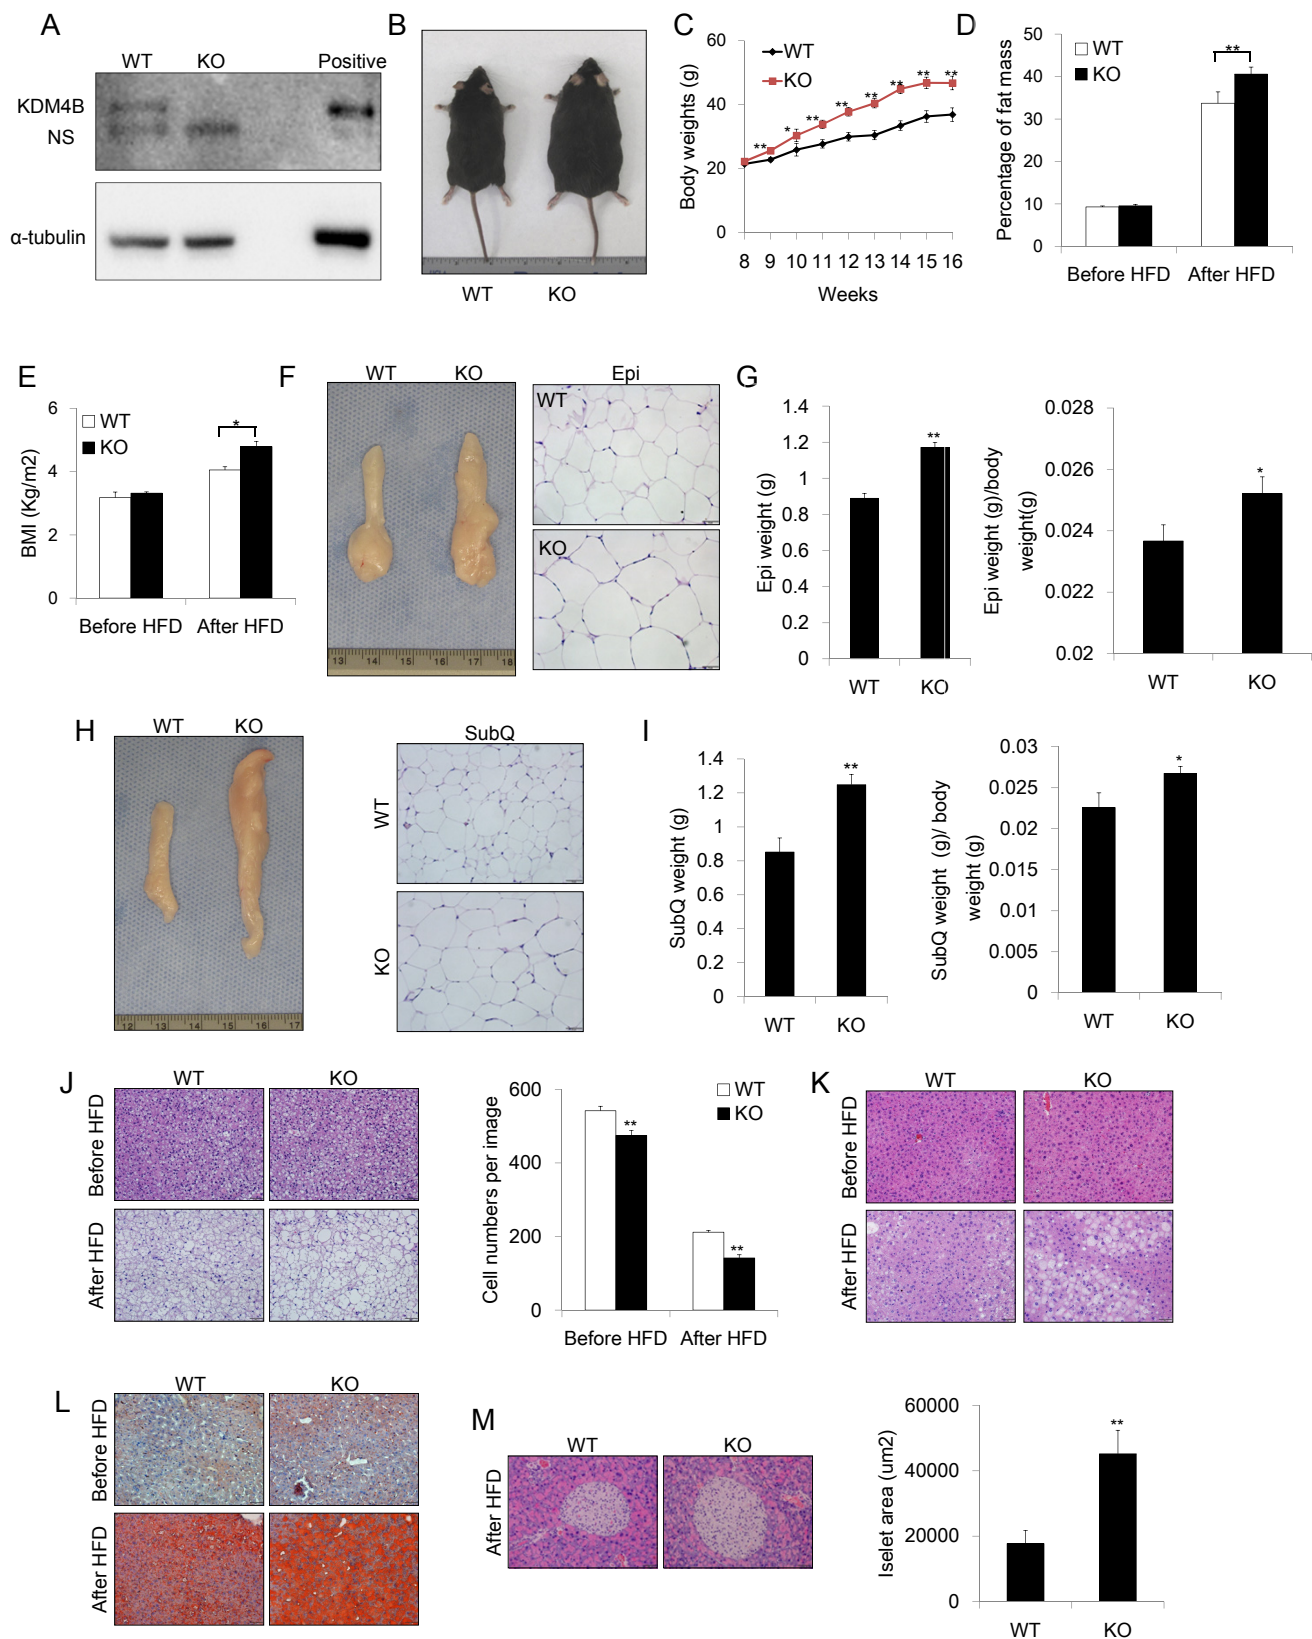

**Figure S1. Whole body *Kdm4b* knockout mice on HFD display accelerates the onset of obesity.** (A) Confirming KDM4B deletion by Western blot. (B) Representative images of male 4-month-old WT and knockout (KO) mice after HFD feeding. (C) Growth curve of WT and KO littermates (n=8). (D) Determination of percentage of fat mass of WT and KO mice using NMR imaging (n=8). (E) Determination of BMI of WT and KO mice before and after HFD feeding (n=8). (F) Representative images of Epi WAT and H&E staining of Epi from WT and KO mice after HFD

feeding. Scale bars, 50  $\mu\text{m}$ . **(G)** Determination of Epi weights from WT and KO mice after HFD feeding and the fat pad weight normalized to body weight (n=8). **(H)** Representative images of SubQ WAT and H&E staining of SubQ from WT and KO mice after HFD feeding. Scale bars, 50  $\mu\text{m}$ . **(I)** Determination of SubQ from WT and KO mice after HFD feeding and the fat pad weight normalized to body weight (n=8). **(J)** Representative H&E staining images of BAT and quantification of cell numbers in BAT for WT and KO mice. Scale bars, 50  $\mu\text{m}$ . **(K)** Representative H&E staining images of livers of WT and KO mice **(L)** Representative Oil Red O staining images of liver for WT and KO mice. Scale bars, 50  $\mu\text{m}$ . **(M)** Representative H&E staining images of pancreases and determination of islet size for WT and KO mice (n=8). \*\*P < 0.01. Student's t test. Scale bars, 50  $\mu\text{m}$ . \*P < 0.05, \*\*P < 0.01. All data are presented as the mean  $\pm$  s.e.m.

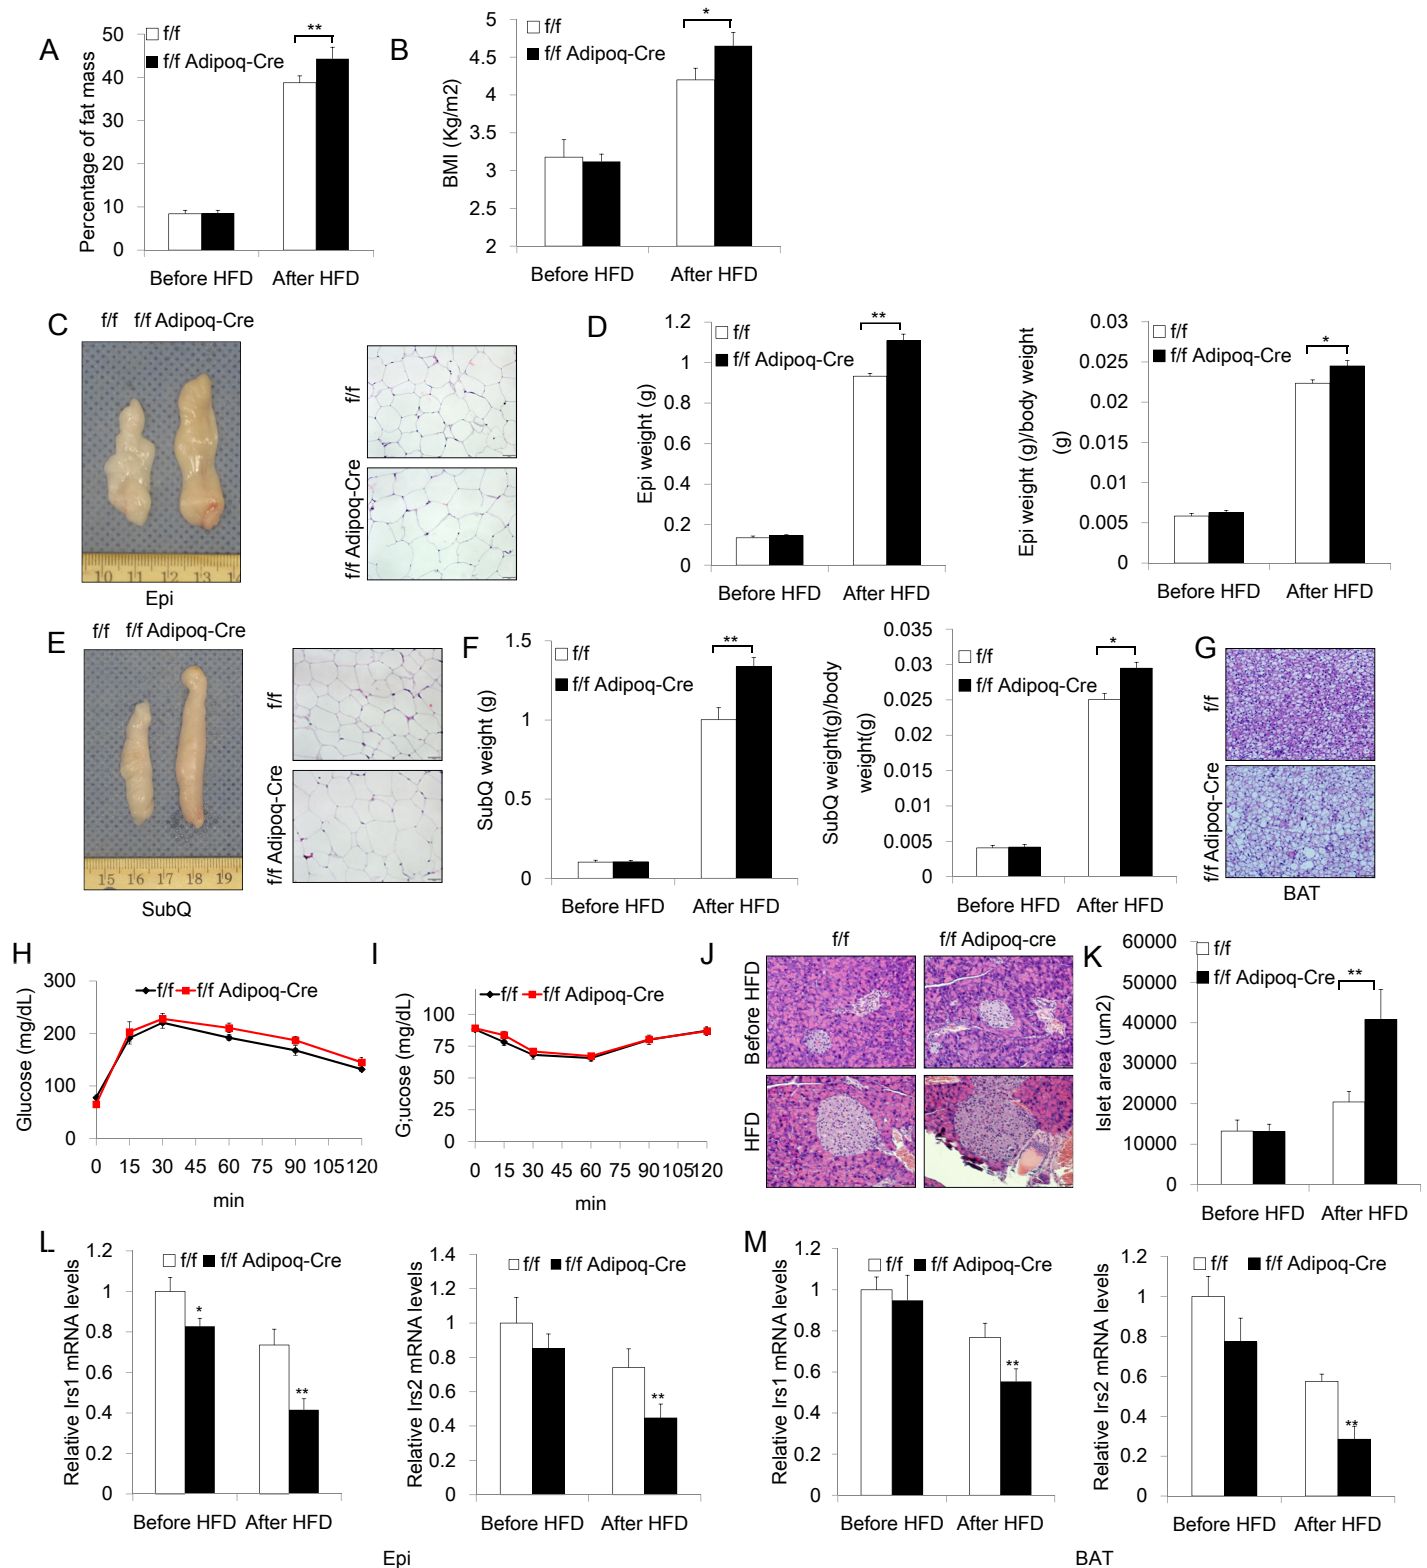

**Figure. S2. *Kdm4b<sup>ff</sup>Adipoq-Cre* mice on HFD display accelerated the onset of obesity.** (A) Determination of percentage of fat mass using nuclear magnetic resonance scanner of *Kdm4b<sup>ff</sup>* and *Kdm4b<sup>ff</sup>Adipoq-Cre* littermates upon HFD feeding for 10 weeks (n=8). (B) Determination of BMI of *Kdm4b<sup>ff</sup>* and *Kdm4b<sup>ff</sup>Adipoq-Cre* littermates upon HFD feeding for 10 weeks (n=8). (C) Representative images of Epi WAT and H&E staining of Epi from *Kdm4b<sup>ff</sup>* and *Kdm4b<sup>ff</sup>Adipoq-Cre* littermates. Scale bars, 50  $\mu$ m. (D) Determination of Epi weights of *Kdm4b<sup>ff</sup>* and *Kdm4b<sup>ff</sup>Adipoq-Cre* mice and fat weight normalized to body weight before and after HFD feeding (n=8). (E) Representative images of SubQ WAT and H&E staining of SubQ from *Kdm4b<sup>ff</sup>* and *Kdm4b<sup>ff</sup>Adipoq-Cre* littermates. Scale bars, 50  $\mu$ m. (F) Determination of SubQ weights of *Kdm4b<sup>ff</sup>*

and *Kdm4b<sup>ff</sup>Adipoq-Cre* mice and fat weight normalized to body weight before and after HFD feeding (n=8). **(G)** Representative H&E staining images of BAT of *Kdm4b<sup>ff</sup>* and *Kdm4b<sup>ff</sup>Adipoq-Cre* mice after HFD feeding. Scale bars, 50  $\mu$ m. **(H and I)** Plasma blood glucose during insulin tolerance test (ITT) **(H)** and glucose tolerance test (GTT) **(I)** before HFD *Kdm4b<sup>ff</sup>* and *Kdm4b<sup>ff</sup>Adipoq-Cre* mice (n=5). **(J and K)** Representative H&E staining images of pancreases **(J)** and determination of islet size **(K)** for *Kdm4b<sup>ff</sup>* and *Kdm4b<sup>ff</sup>Adipoq-Cre* mice before and after HFD feeding (n=6). **(L and M)** Expression levels of markers *Irs1* and *Irs2* in WAT **(L)** and BAT **(M)** for *Kdm4b<sup>ff</sup>* and *Kdm4b<sup>ff</sup>Adipoq-Cre* mice before and after HFD feeding. (n=6). \*P < 0.05, \*\*P < 0.01. All data are presented as the mean  $\pm$  s.e.m.

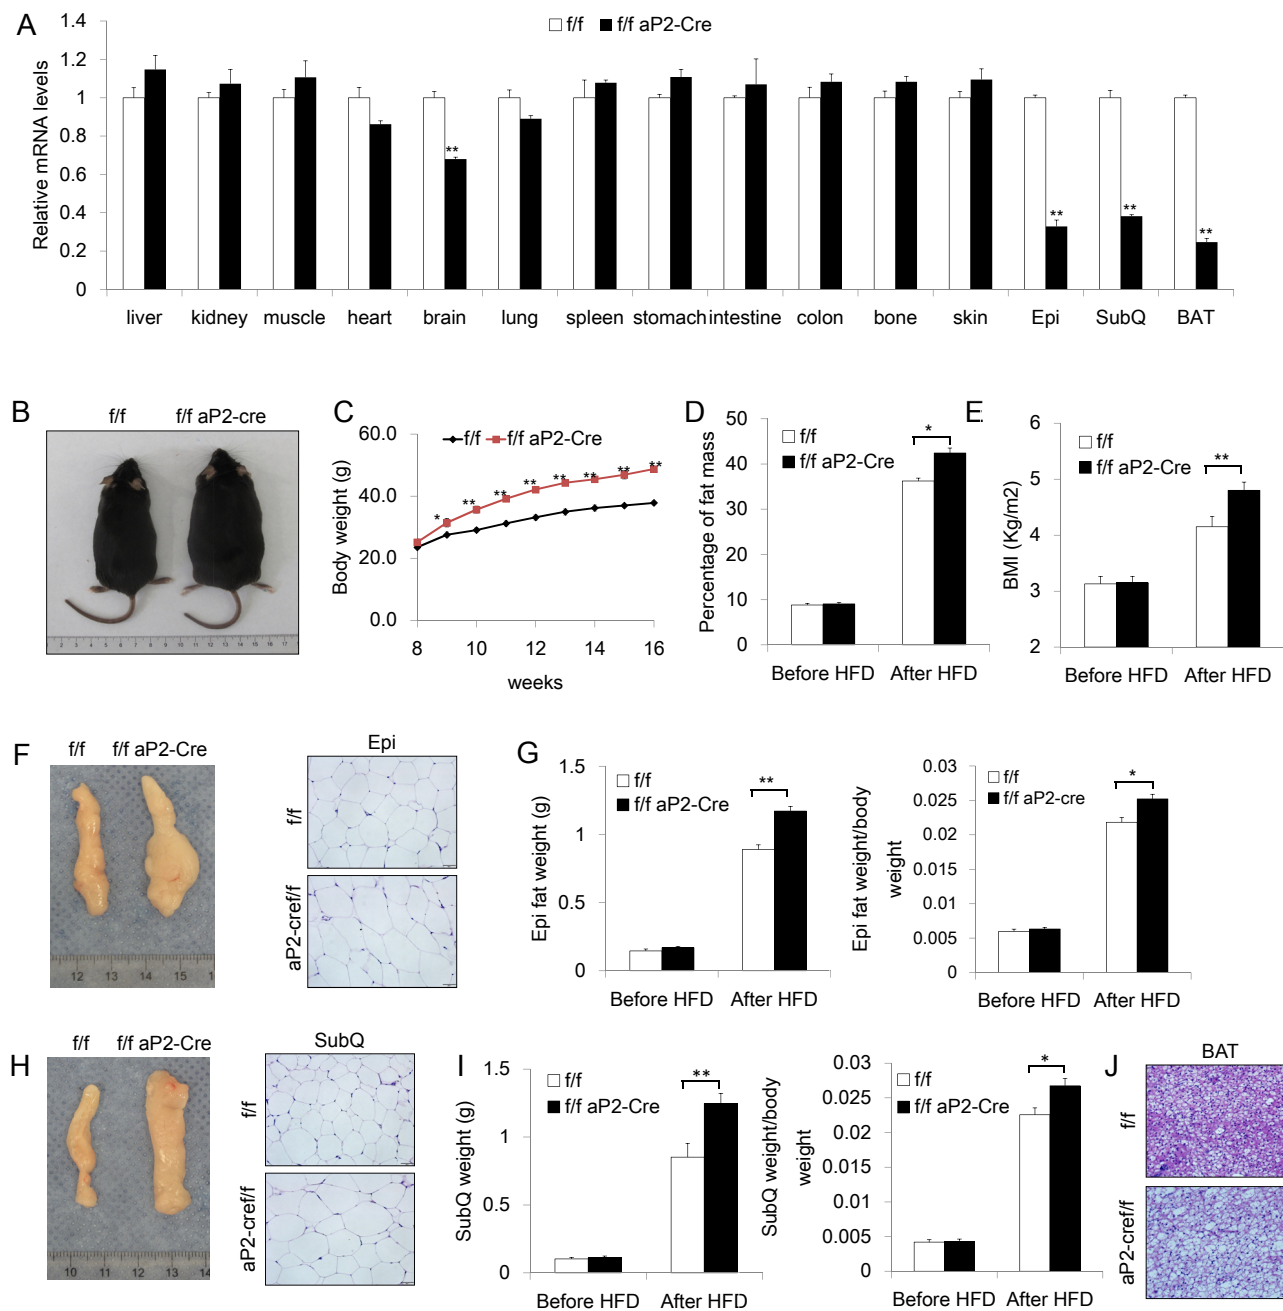

**Figure. S3. *Kdm4b*<sup>ff</sup> *aP2-Cre* mice are prone to obesity following high fat diet.** (A) Verification of adipose-specific deletion of *Kdm4b* using Real Time RT-PCR (n=5). (B) Representative images of *Kdm4b*<sup>ff</sup> and *Kdm4b*<sup>ff</sup> *aP2-Cre* littermates after HFD feeding. (C) Growth curve of *Kdm4b*<sup>ff</sup> and *Kdm4b*<sup>ff</sup> *aP2-Cre* littermates during 8-week HFD feeding (n=8). (D) Determination of percentage of fat mass for *Kdm4b*<sup>ff</sup> and *Kdm4b*<sup>ff</sup> *aP2-Cre* mice before and after HFD feeding (n=8). (E) Determination of BMI for *Kdm4b*<sup>ff</sup> and *Kdm4b*<sup>ff</sup> *aP2-Cre* mice before and after HFD feeding (n=8). (F) Representative images of Epi WAT for *Kdm4b*<sup>ff</sup> and *Kdm4b*<sup>ff</sup> *aP2-Cre* mice after HFD feeding and H&E staining of Epi. Scale bars, 50  $\mu$ m. (G) Determination of the net weight of Epi for *Kdm4b*<sup>ff</sup> and *Kdm4b*<sup>ff</sup> *aP2-Cre* mice and fat weight normalized to body weight before and after HFD feeding (n=8). (H) Representative images of SubQ WAT and H&E staining. Scale bars, 50  $\mu$ m. (I) Determination of the net weight of SubQ and fat weight normalized to body weight before and after HFD feeding (n=8). (J) Representative H&E staining images of BAT for *Kdm4b*<sup>ff</sup> and *Kdm4b*<sup>ff</sup> *aP2-Cre* before and after HFD feeding. Scale bars, 50  $\mu$ m. \*P < 0.05, \*\*P < 0.01. All data is presented as the mean  $\pm$  s.e.m.



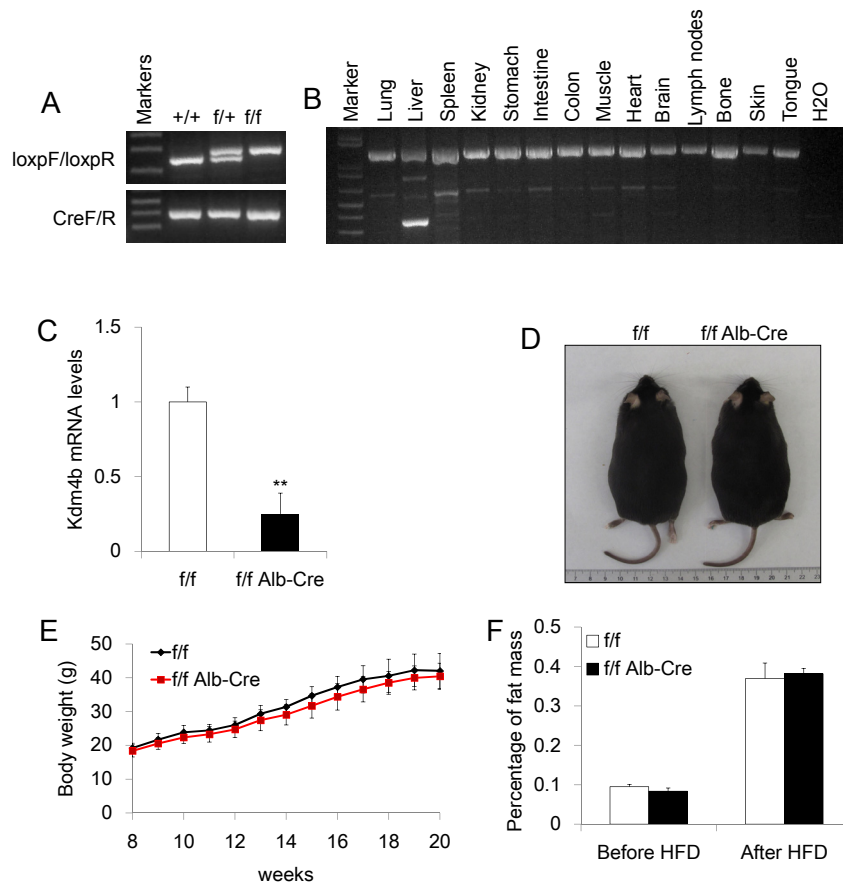

**Figure. S4. *Kdm4b* liver-specific knockout mice do not exacerbate diet-induced obesity.** (A) Genotyping analysis of WT, *f/+* and *f/f* in *Kdm4b<sup>fl/fl</sup> Alb-Cre* mice. (B) DNA PCR analysis of different tissues of *Kdm4b<sup>fl/fl</sup> Alb-Cre* mice verifying liver specific deletion of *Kdm4b* gene. (C) Real-Time RT-PCR showing mRNA levels of *Kdm4b* in liver tissue of *Kdm4b<sup>fl/fl</sup>* and *Kdm4b<sup>fl/fl</sup> Alb-Cre* mice. (n=8). (D) Representative image of *Kdm4b<sup>fl/fl</sup>* and *Kdm4b<sup>fl/fl</sup> Alb-Cre* littermate after HFD feeding. (E) Growth curve of *Kdm4b<sup>fl/fl</sup>* and *Kdm4b<sup>fl/fl</sup> Alb-Cre* littermates after 12 weeks of HFD (n=8). (F) Determination of percentage of fat mass by nuclear magnetic resonance scanner for *Kdm4b<sup>fl/fl</sup>* and *Kdm4b<sup>fl/fl</sup> Alb-Cre* before and after HFD feeding (n=8). \*\*P < 0.01. All data are presented as the mean ± s.e.m.

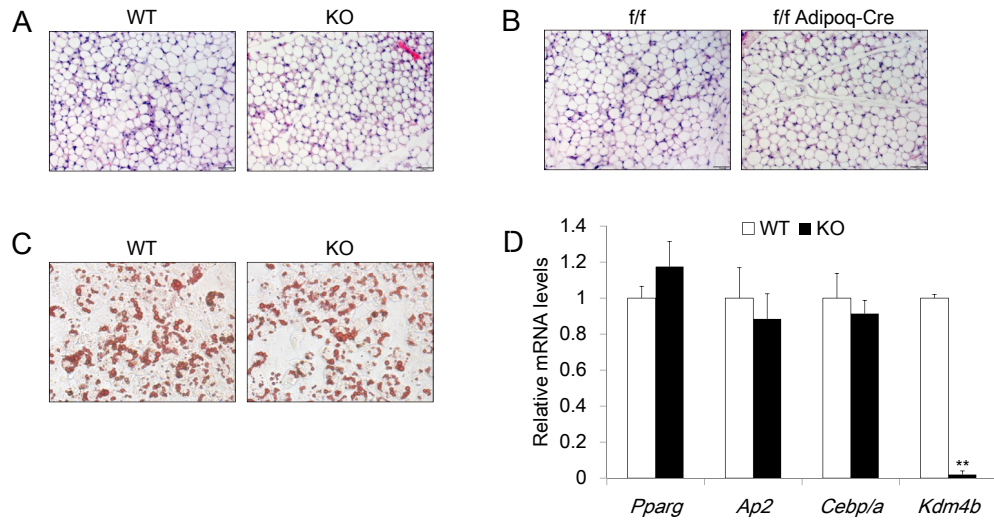

**Figure. S5. KDM4B is not required for cold-induced SubQ fat browning and has no effect on adipogenic differentiation.** (A) Histological examination of SubQ fat browning in WT and KO mice upon cold stimulation. (B) Histological examination of SubQ fat browning *Kdm4b<sup>f/f</sup>* and *Kdm4b<sup>f/f</sup>Adipoq-Cre* mice upon cold stimulation. (C) Representative images of Oil Red O staining for differentiation of preadipocytes isolated from WT and KO mice. (D) Gene expression of adipogenic marker genes for preadipocytes isolated from WT and KO mice during adipogenic differentiation. Error bars represent mean  $\pm$  SD for triplicate experiments. \*\*P < 0.01.

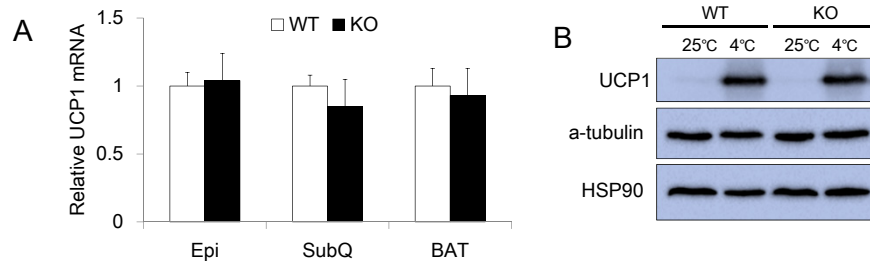

**Figure. S6. The deletion of KDM4B does not impair *Ucp1* expression.** (A) RT-qPCR showed the mRNA levels of *Ucp1* in Epi fat, SubQ fat and Brown fat of 2 months WT and KO mice. \*\*P < 0.01. Data are presented as the mean  $\pm$  s.e.m. (B) Western blot showed that the deletion of KDM4B did not impair cold-induced UCP1 protein expression.

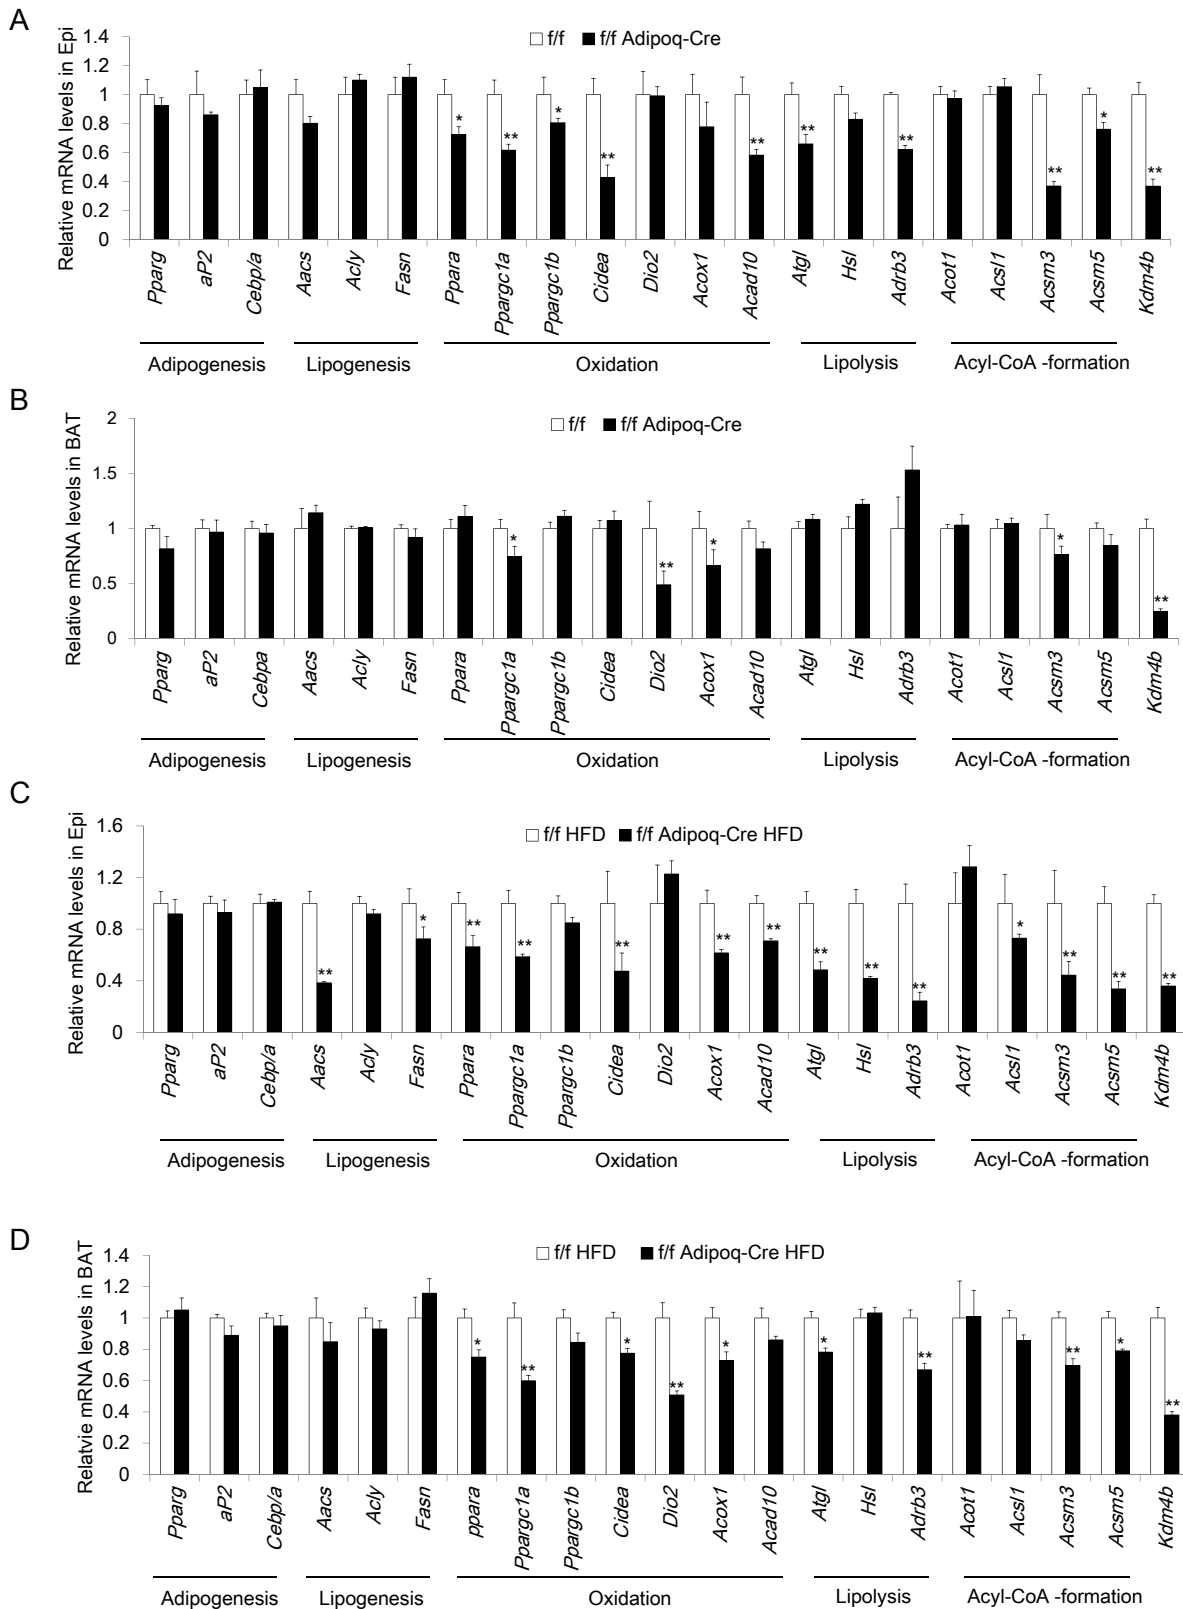

**Figure. S7. KDM4B regulates metabolic genes. (A and B)** Real Time RT-PCR analysis of metabolic marker genes in Epi (A) and BAT (B) of control *Kdm4b<sup>ff</sup>* and *Kdm4b<sup>ff</sup> Adipoq-Cre* mice before HFD feeding at 2 months. (C and D) Real Time RT-PCR analysis of metabolic marker genes in Epi (C) and BAT (D) of control *Kdm4b<sup>ff</sup>* and *Kdm4b<sup>ff</sup> Adipoq-Cre* mice after HFD feeding. \*P < 0.05, \*\*P < 0.01. Data are presented as the mean  $\pm$  s.e.m.

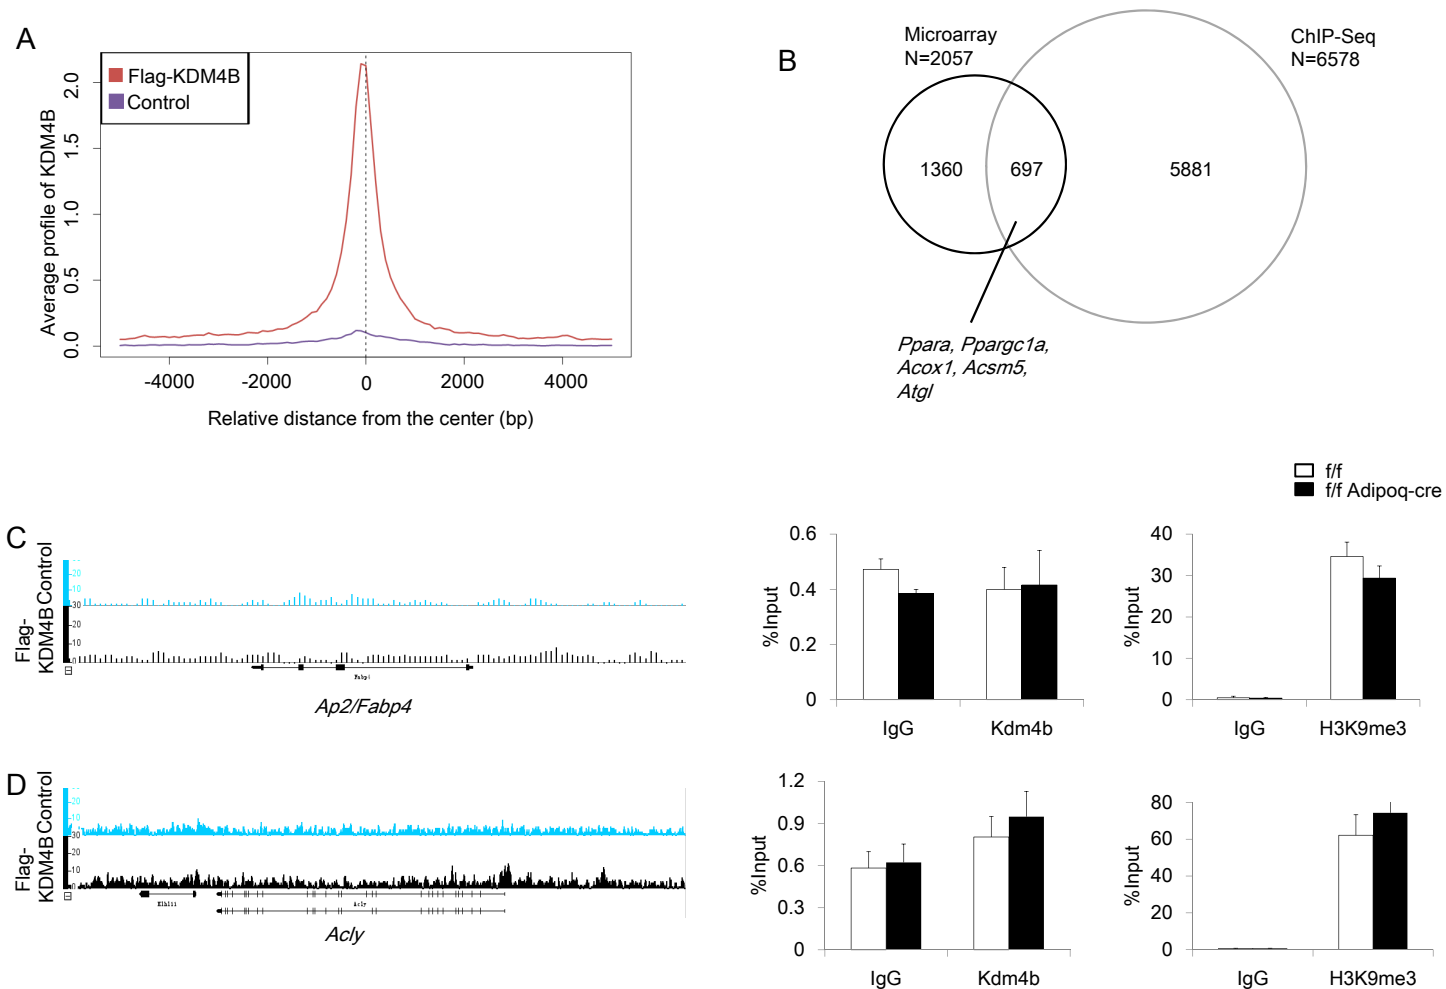

**Figure. S8. H3K9me3 marks are not changed on the promoters of genes that are not regulated in *Kdm4b* KO mice.** (A) The average bindings of KDM4B for all refseq gene promoters, spanning  $\pm 5$  kb of the closest TSSs. Red line (Flag-KDM4B), average KDM4B binding in *Kdm4b*<sup>-/-</sup>/Flag-KDM4B cells with anti-Flag antibodies; Purple line (Control), average KDM4B binding in *Kdm4b*<sup>-/-</sup>/EV cells. (B) Venn diagram of overlap of genome-wide gene expression data and KDM4B ChIP-seq data. (C) The KDM4B occupancy and the levels of H3K9me3 marks on the promoter of *Ap2/Fabp4* were measured by ChIP-qPCR. (D) The KDM4B occupancy and the levels of H3K9me3 marks on the promoter of *Acly* were measured by ChIP-qPCR. Error bars represent mean  $\pm$  SD for triplicate experiments.

**Table S1. Primer list**

| <b>RT-qPCR primers</b> | <b>Sequence 5'-3'</b>   | <b>Size</b> |
|------------------------|-------------------------|-------------|
| Irs1F                  | CTATGCCAGCATCAGCTTCC    | 93bp        |
| Irs1R                  | TTGCTGAGGTCATTTAGGTCTTC |             |
| Irs2F                  | TCCAGGCACTGGAGCTTT      | 107bp       |
| Irs2R                  | GGCTGGTAGCGCTTCACT      |             |
| PpargF                 | ATTAGATGACAGTGA CT TGGC | 101bp       |
| PpargR                 | TGTCTTGGATGTCCTCGATG    |             |
| aP2F                   | GCTGGTGGTGG AATGTGTTA   | 89bp        |
| aP2R                   | AATTTCCATCCAGGCCTCTT    |             |
| C-EBPaF                | TCAGACCAGAAAGCTGAGTTGTG | 100bp       |
| C-EBPaR                | TGGTCCCCGTGTCCTCCT      |             |
| AacsF                  | GCTGAGTTCTGGAAGTTCAG    | 82bp        |
| AacsR                  | CATCTGCAATCCCTTTGGATG   |             |
| AclyF                  | TCAGTCCCAAGTCCAAGATCC   | 134bp       |
| AclyR                  | TCTCGGGAACACACGTAGTC    |             |
| FasnF                  | CCAAGCAGGCACACACAATG    | 110bp       |
| FasnR                  | AGTGTTTCGTTCTCGGAGTG    |             |
| Ppara F                | AACTGGATGACAGTGACATTTCC | 103bp       |
| Ppara R                | CCCTCCTGCAACTTCTCAAT    |             |
| Ppargc1aF              | CCCTGCCATTGTTAAGAC      | 160bp       |
| Ppargc1aR              | GCTGCTGTTCTGTTTTTTC     |             |
| Ppargc1bF              | GAGGGCTCCGGCACTTCC      | 89bp        |
| Ppargc1bR              | GTACTTGCTTTTTCCAGATG    |             |
| CideaF                 | ACATCCAGCTCGCCCTTTTC    | 133bp       |
| CideaR                 | CAGCGTAACCAGGCCAGTTG    |             |
| Dio2F                  | ATGCTGACCTCAGAAGGGCT    | 105bp       |
| Dio2R                  | GTGCACCACACTGGAATTGG    |             |
| Acox1F                 | GCATCGCAGACCCTGAAGAA    | 144bp       |
| Acox1R                 | GGTGCATCCATTTCTCCTGC    |             |
| Acad10F                | CTTGGAGAAGTACCTGAAGG    | 106bp       |
| Acad10R                | CAGCCTGATGTAGTACGTTG    |             |
| AtglF                  | GCCAACGCCACTCACATCTA    | 90bp        |
| AtglR                  | AATGTTGGCACCTGCTTCAC    |             |
| HslF                   | TGGA ACTAAGTGGACGCAAG   | 91bp        |
| HslR                   | TCAGACACACTCCTGCGCA     |             |
| Adrb3F                 | CGCTCAACAGGTTTGATGGC    | 95bp        |
| Adrb3R                 | GTTCCAGGGGACTCACTAGC    |             |
| Acot1F                 | ATGATGGTTTGGAGGTTGGG    | 143bp       |
| Acot1R                 | CCAGCCCTTGAATCAGCAC     |             |
| Acsl1F                 | AGCCACCATGTGACCTCTC     | 114bp       |
| Acsl1R                 | CATCGTCGTAGTAGTACACC    |             |
| Acsm3F                 | ATCTACTTACCAGTGGGAC     | 143bp       |

|                      |                        |       |
|----------------------|------------------------|-------|
| Acsm3R               | CCTGTATCTGAAGTATTCCAC  |       |
| Acsm5F               | GCTCATGATGTGTTGGATGTG  | 104bp |
| Acsm5R               | CTCTTGACTTCTGTTCTGAG   |       |
| Cox7a1F              | GAGGACGCAAATGAGGGC     | 91bp  |
| Cox7a1R              | GCCACACGGTTTTCTAAGTGG  |       |
| Atp5c1F              | CCTTGACTTTCAACCGCACC   | 114bp |
| Atp5c1R              | CCTCTTGTCTGAGGATGCAACT |       |
| Atp5g2F              | GCGGCCTCTGACTTCACTTA   | 54bp  |
| Atp5g2R              | GAAATGGCGCTGGTTTGGAA   |       |
| 36B4F1               | GCCAGCTCAGAACACTGGTCTA | 60bp  |
| 36B4R1               | ATGCCCAAAGCCTGGAAGA    |       |
| HprtF                | TGCTGACCTGCTGGATTACA   | 120bp |
| HprtR                | TTTATGTCCCCCGTTGACTGA  |       |
| Kdm4bF               | TGTCTACCCATCTATGGAG    | 96bp  |
| Kdm4brealR           | ATGTCTAGGATGGTCCTCAG   |       |
| <b>CHIP Primers</b>  |                        |       |
| Ppargc1aChIPF3       | AGGGCTCCGTTTTAGAGTTG   | 142bp |
| Ppargc1aChIPR3       | TGCCTCAGTGAAGTAACGCTT  |       |
| Ppargc1a 8kbup ChIPF | ACACTGCGTTCTTGTCTTGT   | 110bp |
| Ppargc1a 8kbup ChIPR | CGAAAAACCGCACAACTGGT   |       |
| PparalphachipF2      | CTGTCCGCCACTTCGAGTC    | 58bp  |
| PparalphachipR2      | GAACACCAATGTTCCGGAGCC  |       |
| Ppara 8kbup ChIPF    | CTTCTGTAGGCAGCAGCACA   | 54bp  |
| Ppara 8kbup ChIPR    | CAGGCAGGTCCAAGTGCTAA   |       |
| Acox1ChipF1          | GACCCTTGACACCCATTCCC   | 107bp |
| Acox1ChipR1          | GGACTCACCTCCTTTCAGGC   |       |
| Acox1 8kbup ChIPF    | ACGGACTACTGACTACGGGA   | 53bp  |
| Acox1 8kbup ChIPR    | TTGGCACTGCAGGTACATGAT  |       |
| AtglChIPF            | CATTGGTCTCCCCGAACTGG   | 71bp  |
| AtglChIPR            | GTCACAGCAGTTTGTAGCGG   |       |
| Atgl 4kupChIPF       | TAGGAGGGTCCAGGGTTCTG   | 108bp |
| Atgl 4kupChIPR       | GCTGGGTCAACTCCCATGAA   |       |
| Acsm5ChIPF3          | CACAGTCAGCCTTCAGTGGT   | 112bp |
| Acsm5ChIPR3          | TCCCTTGGGGCAAATTCCTC   |       |
| Acsm5 8kbdown ChIPF3 | GGACCAATCTTGGAGCAGTCT  | 80bp  |
| Acsm5 8kbdown ChIPR3 | GCCAAATAACCTCCACGAGC   |       |
| aP2ChIPF1            | TTGACAGTCAAACAGGAACC   | 83bp  |
| aP2ChIPR1            | CTGGCAATGATCACTGGACT   |       |
| AclyChIPF            | CTGCTTAGCCTGTGAGCTGAT  | 137bp |
| AclyChIPR            | GTGGCTCTCTGTCCGTAAGC   |       |

| <b>Genotyping primers</b> |                                |             |
|---------------------------|--------------------------------|-------------|
| CreF                      | GCATTACCGGTCGATGCAACGAGTGATGAG | 408bp       |
| CreR                      | GAGTGAACGAACCTGGTCGAAATCAGTGCG |             |
| Kdm4bloxpF                | ACCCAGGACTGATGTTTACA           | 221bp/291bp |
| Kdm4bloxpR                | GAAAGAAGACCTGAGCTGTC           |             |
| Kdm4bGenoF                | TGGCTCTCTTAGGGGCAGTC           |             |



## References

1. Folch J, Lees M, & Sloane Stanley GH (1957) A simple method for the isolation and purification of total lipides from animal tissues. *The Journal of biological chemistry* 226(1):497-509.
2. Chan CB, et al. (2015) Activation of muscular TrkB by its small molecular agonist 7,8-dihydroxyflavone sex-dependently regulates energy metabolism in diet-induced obese mice. *Chem Biol* 22(3):355-368.
3. Vergnes L, Chin R, Young SG, & Reue K (2011) Heart-type fatty acid-binding protein is essential for efficient brown adipose tissue fatty acid oxidation and cold tolerance. *J Biol Chem* 286(1):380-390.
4. Ye L, et al. (2012) Histone demethylases KDM4B and KDM6B promotes osteogenic differentiation of human MSCs. *Cell Stem Cell* 11(1):50-61.
5. Gollub J & Sherlock G (2006) Clustering microarray data. *Methods Enzymol* 411:194-213.
6. Li J, et al. (2013) LATS2 suppresses oncogenic Wnt signaling by disrupting beta-catenin/BCL9 interaction. *Cell Rep* 5(6):1650-1663.
7. Haim Y, Tarnowski T, Bashari D, & Rudich A (2013) A chromatin immunoprecipitation (ChIP) protocol for use in whole human adipose tissue. *Am J Physiol Endocrinol Metab* 305(9):E1172-1177.
8. Li J, et al. (2017) KDM3 epigenetically controls tumorigenic potentials of human colorectal cancer stem cells through Wnt/beta-catenin signalling. *Nature communications* 8:15146.
